# Supplementary material for: Randomised crossover study on pulse oximeter readings from different sensors in very preterm infants
Source: HighWire-hosted journal article supplement (doi:10.1136/archdischild-2023-325961), 2023-12-21

## Online supplemental material

Supplementary Table 1: Lot-numbers used in group 2

|                   | LNCS  | PPG     | RD    |
|-------------------|-------|---------|-------|
| group2 - infant 1 | 22CXP | 20KGJ   | 22E53 |
| group2 - infant 2 | 22CMY | A20EG73 | 21GWF |
| group2 - infant 3 | 19MSK | 22FSO   | 21CTK |
| group2 - infant 4 | 22FAK | 22DMQ   | 22FUA |
| group2 - infant 5 | 22EUC | A21CJ31 | 21M7Z |
| group2 - infant 6 | 22CCV | 22H6J   | 21JZC |

Supplementary Table 2: Randomization-Clusters

| Phase           | I (2 hours) |      |      | II (2 hours) |      |      | III (2 hours) |      |      |
|-----------------|-------------|------|------|--------------|------|------|---------------|------|------|
|                 | 1           | 2    | 3    | 1            | 2    | 3    | 1             | 2    | 3    |
| Sensor position |             |      |      |              |      |      |               |      |      |
| Variant 1       | LNCS        | RD   | PPG  | PPG          | LNCS | RD   | RD            | PPG  | LNCS |
| Variant 2       | PPG         | LNCS | RD   | RD           | PPG  | LNCS | LNCS          | RD   | PPG  |
| Variant 3       | RD          | PPG  | LNCS | LNCS         | RD   | PPG  | PPG           | LNCS | RD   |
| Variant 4       | LNCS        | PPG  | RD   | RD           | LNCS | PPG  | PPG           | RD   | LNCS |
| Variant 5       | RD          | LNCS | PPG  | PPG          | RD   | LNCS | LNCS          | PPG  | RD   |
| Variant 6       | PPG         | RD   | LNCS | LNCS         | PPG  | RD   | RD            | LNCS | PPG  |

Supplementary Table 3: Demographic data

| Pat-ID                          | Gender     | Weight<br>in g      | PMA<br>in weeks | Age<br>in days            | Weight<br>in g | PMA in<br>weeks | Mean FiO2                        | FiO2-<br>Controlling<br>in infants<br>with FiO2<br>> 0.21 |
|---------------------------------|------------|---------------------|-----------------|---------------------------|----------------|-----------------|----------------------------------|-----------------------------------------------------------|
|                                 |            | on the day of birth |                 | on the day of examination |                |                 |                                  |                                                           |
| 1                               | female     | 945                 | 29 1/7          | 6                         | 1090           | 30              | 0.21                             | -                                                         |
| 2                               | female     | 1085                | 28 3/7          | 10                        | 1190           | 29 6/7          | 0.21                             | -                                                         |
| 3                               | female     | 600                 | 26              | 40                        | 1370           | 31 5/7          | 0.34 - 0.71                      | FiO2-C                                                    |
| 4                               | male       | 760                 | 27 1/7          | 13                        | 920            | 29              | 0.21 - 0.27                      | -                                                         |
| 5                               | male       | 730                 | 27 6/7          | 12                        | 990            | 29 4/7          | 0.21 - 0.25                      | -                                                         |
| 6                               | male       | 540                 | 28              | 10                        | 630            | 29 3/7          | 0.21                             | -                                                         |
| 7                               | female     | 1270                | 28 5/7          | 10                        | 1370           | 30 1/7          | 0.21 - 0.24                      | -                                                         |
| 8                               | male       | 1150                | 28 5/7          | 9                         | 1260           | 30              | 0.21                             | -                                                         |
| 9                               | female     | 820                 | 27 6/7          | 9                         | 890            | 29 1/7          | 0.21                             | -                                                         |
| 10                              | female     | 1500                | 31 5/7          | 2                         | 1450           | 32              | 0.21                             | -                                                         |
| 11                              | female     | 1170                | 31 5/7          | 2                         | 1210           | 32              | 0.21                             | -                                                         |
| 12                              | male       | 670                 | 24 5/7          | 6                         | 640            | 25 4/7          | 0.22 - 0.28                      | RMC                                                       |
| 13                              | female     | 1425                | 31              | 8                         | 1478           | 32 1/7          | 0.21                             | -                                                         |
| 14                              | female     | 1440                | 31              | 8                         | 1494           | 32 1/7          | 0.21                             | -                                                         |
| 15                              | male       | 860                 | 26 6/7          | 13                        | 1060           | 28 5/7          | 0.22 - 0.30                      | FiO2-C                                                    |
| 16                              | female     | 440                 | 23              | 54                        | 880            | 30 5/7          | 0.21 - 0.25                      | -                                                         |
| 17                              | male       | 960                 | 27 6/7          | 24                        | 1234           | 31 2/7          | 0.24 - 0.26                      | RMC                                                       |
| 18                              | male       | 290                 | 24 1/7          | 85                        | 1270           | 36 2/7          | 0.21 - 0.24                      | -                                                         |
| <u>Group 1:</u>                 | 10x female | 925                 | 28 0/7          | 18                        | 1135           | 30 4/7          | 9x FiO2 = 0.21                   | 2x RMC<br>2x FiO2-C                                       |
|                                 | 8x male    | ±345                | ±2 3/7          | ±21                       | ±259           | ±2 1/7          | 5x FiO2 ≥ 0.21<br>4x FiO2 > 0.21 |                                                           |
| " +1 "                          | female     | 990                 | 30              | 14                        | 1290           | 32              | 0.21                             | -                                                         |
| " +2 "                          | male       | 550                 | 24 2/7          | 51                        | 1120           | 31 4/7          | 0.24 - 0.28                      | RMC                                                       |
| " +3 "                          | female     | 755                 | 25 1/7          | 12                        | 830            | 26 6/7          | 0.24 - 0.28                      | FiO2-C                                                    |
| " +4 "                          | male       | 550                 | 24 1/7          | 51                        | 990            | 31 3/7          | 0.30 - 0.40                      | FiO2-C                                                    |
| " +5 "                          | male       | 1050                | 27 5/7          | 7                         | 1000           | 28 5/7          | 0.21 - 0.23                      | -                                                         |
| " +6 "                          | male       | 390                 | 27 6/7          | 19                        | 860            | 30 4/7          | 0.30 - 0.35                      | FiO2-C                                                    |
| <u>Group 2:</u>                 | 2x female  | 714                 | 26 4/7          | 26                        | 1015           | 30 1/7          | 1x FiO2 = 0.21                   | 1x RMC<br>3x FiO2-C                                       |
|                                 | 4x male    | ±241                | ±2 1/7          | ±18                       | ±156           | ±1 6/7          | 1x FiO2 ≥ 0.21<br>4x FiO2 > 0.21 |                                                           |
| <u>Total<br/>(mean<br/>±SD)</u> | 12x female | 873                 | 27 4/7          | 20                        | 1105           | 30 3/7          | 10x FiO2 = 0.21                  | 3x RMC<br>5x FiO2-C                                       |
|                                 | 12x male   | ±335                | ±2 3/7          | ±20                       | ±243           | ±2 0/7          | 6x FiO2 ≥ 0.21<br>8x FiO2 > 0.21 |                                                           |

Supplementary Table 4: Comparison of pulse rates

|                                                 | <u>LNCS</u>  |                               | <u>RD</u>       |                               |   | <u>PPG</u>      |                               |   |
|-------------------------------------------------|--------------|-------------------------------|-----------------|-------------------------------|---|-----------------|-------------------------------|---|
| <u>Pulse-Rate (bpm)</u>                         |              |                               | <i>vs. LNCS</i> |                               |   | <i>vs. LNCS</i> |                               |   |
| <b>Mean (<math>\pm</math>SD)</b>                |              |                               |                 |                               |   |                 |                               |   |
| - all infants:                                  | <b>162.2</b> | <b>(<math>\pm</math>12.0)</b> | <b>162.2</b>    | <b>(<math>\pm</math>11.9)</b> | - | <b>162.3</b>    | <b>(<math>\pm</math>11.9)</b> | - |
| -- group 1:                                     | 160.9        | ( $\pm$ 11.4)                 | 160.9           | ( $\pm$ 11.3)                 | - | 160.9           | ( $\pm$ 11.3)                 | - |
| -- group 2:                                     | 166.1        | ( $\pm$ 12.9)                 | 166.1           | ( $\pm$ 12.9)                 | - | 166.1           | ( $\pm$ 12.9)                 | - |
| <b>Mean difference to LNCS (95%-CI of mean)</b> |              |                               |                 |                               |   |                 |                               |   |
| - all infants:                                  | -            | -                             | <b>-0.003</b>   | <b>(-0.017 to 0.011)</b>      | - | <b>-0.007</b>   | <b>(-0.006 to 0.021)</b>      | - |

Supplementary Figure 1: Bland-Altman-Plots of pulse rate-readings and SpO<sub>2</sub>-values (dots representing individual simultaneous SpO<sub>2</sub>-readings; horizontal lines indicate mean deviation  $\pm$ SD; X-axes indicating mean of two corresponding measurements; Y-axes indicating the difference between the two measurements), showing no systematic deviation in the comparisons of pulse rate between sensor types (Panels 1-4), and systematically lower SpO<sub>2</sub>-values for RD vs LNCS (Panel 5+6) and slightly higher values for PPG vs. LNCS (Panel 7+8)

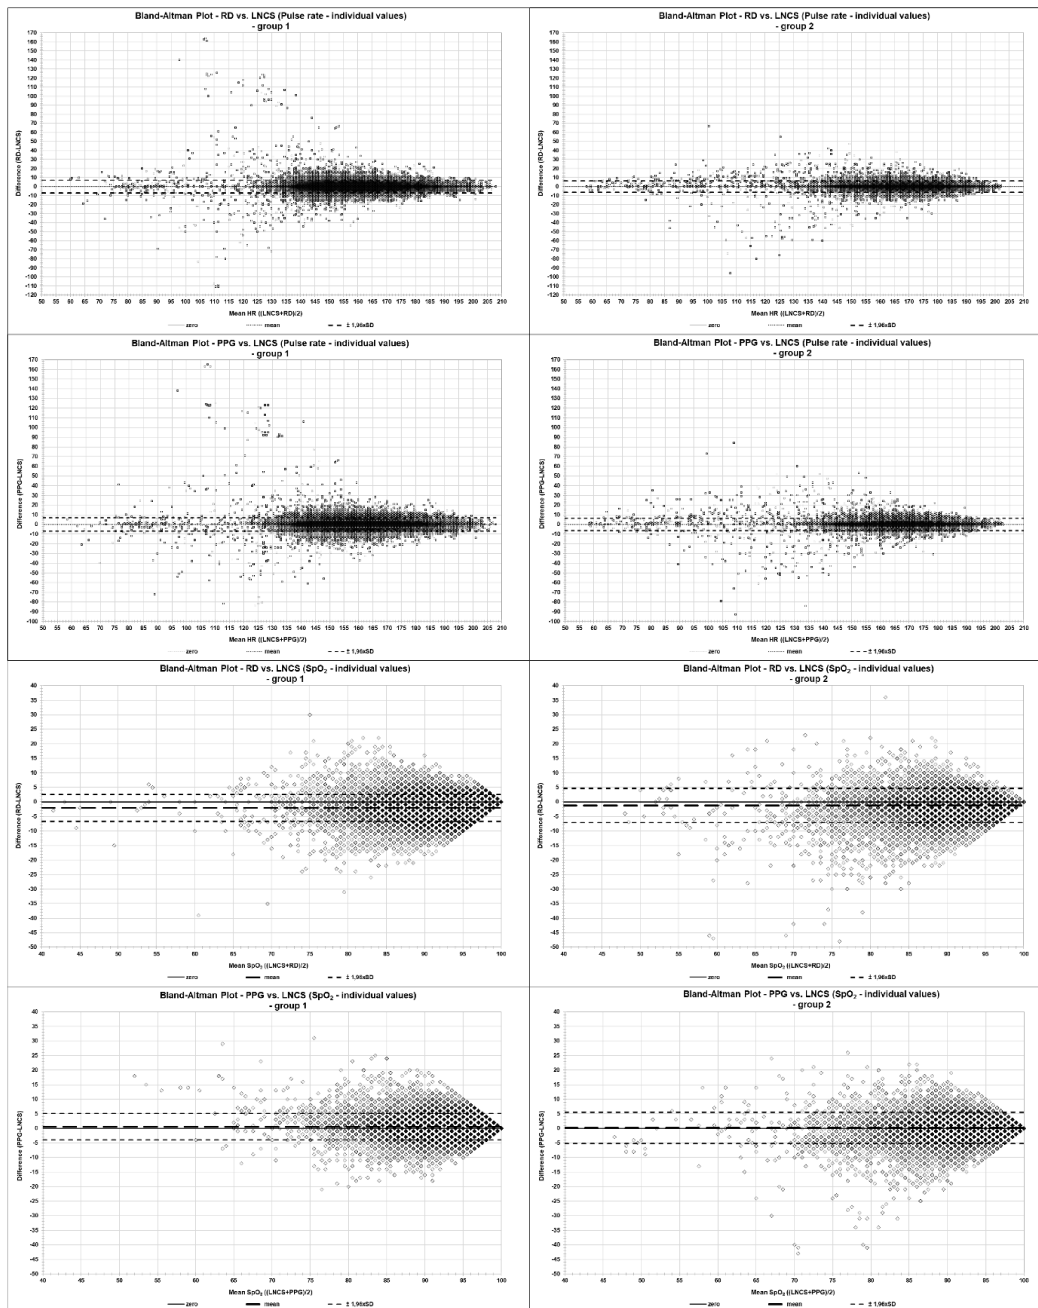

Supplement: archdischild-2023-325961supp001_data_supplement.pdf [file archdischild-2023-325961supp001_data_supplement.pdf]
